# Supplementary material for: Preoperative Typing of Thyroid and Parathyroid Tumors with a Combined Molecular Classifier
Source: MDPI journal article supplement (doi:10.3390/cancers13020237), 2021-01-11
Supplement: s1 [file s1]

## Supplementary Materials

# Preoperative Typing of Thyroid and Parathyroid Tumors with a Combined Molecular Classifier

Titov S.E. et al.

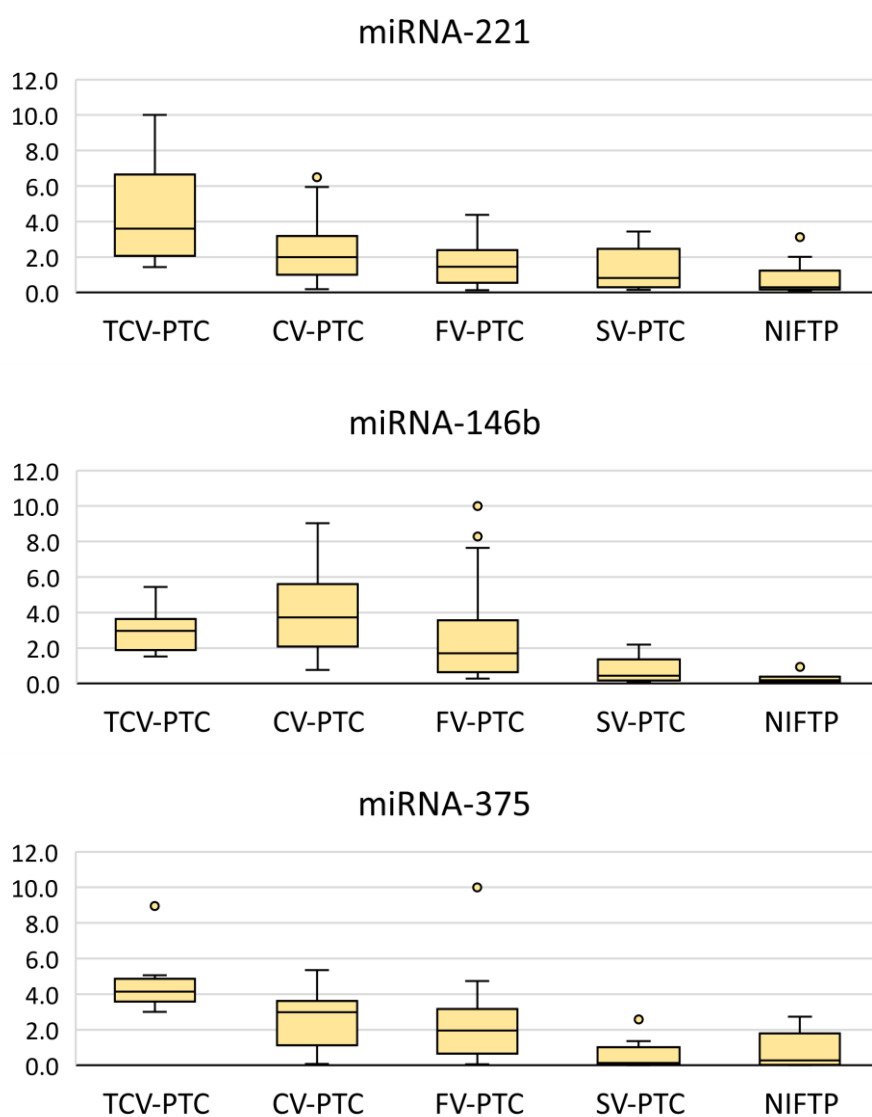

**Figure S1.** Relative expression levels of three miRNAs in different subtypes of PTC and NIFTP. The data are normalized; the figure shows the median value, upper and lower quartiles, a nonoutlier range, and outliers (circles). TCV-PTC, tall-cell variant of PTC; CV-PTC, classic variant of PTC; FV-PTC, follicular variant of PTC; SV-PTC, solid variant of PTC; NIFTP, noninvasive follicular thyroid neoplasm with papillarylike nuclear features.

**Table S1.** P values for pairwise comparisons of miRNA-146b, -221 and -375 expression between various types of PTC and NIFTP

|         |          | CV-PTC          | FV-PTC          | SV-PTC          | NIFTP           |
|---------|----------|-----------------|-----------------|-----------------|-----------------|
| TCV-PTC | miR-146b | 0.446305        | 0.152607        | <b>0.001764</b> | <b>0.000449</b> |
|         | miR-221  | <b>0.025011</b> | <b>0.004550</b> | <b>0.006099</b> | <b>0.002174</b> |
|         | miR-375  | <b>0.005001</b> | <b>0.001548</b> | <b>0.000636</b> | <b>0.000449</b> |
| CV-PTC  | miR-146b |                 | <b>0.037705</b> | <b>0.000157</b> | <b>0.000011</b> |
|         | miR-221  |                 | 0.106038        | 0.110335        | <b>0.002658</b> |
|         | miR-375  |                 | 0.230741        | <b>0.000854</b> | <b>0.000942</b> |
| FV-PTC  | miR-146b |                 |                 | <b>0.013939</b> | <b>0.000052</b> |
|         | miR-221  |                 |                 | 0.420757        | <b>0.021616</b> |
|         | miR-221  |                 |                 | <b>0.005001</b> | <b>0.006065</b> |
| SV-PTC  | miR-146b |                 |                 |                 | 0.111348        |
|         | miR-221  |                 |                 |                 | 0.205668        |
|         | miR-375  |                 |                 |                 | 0.902523        |

Significant ( $p < 0.05$ ) differences are highlighted in bold.

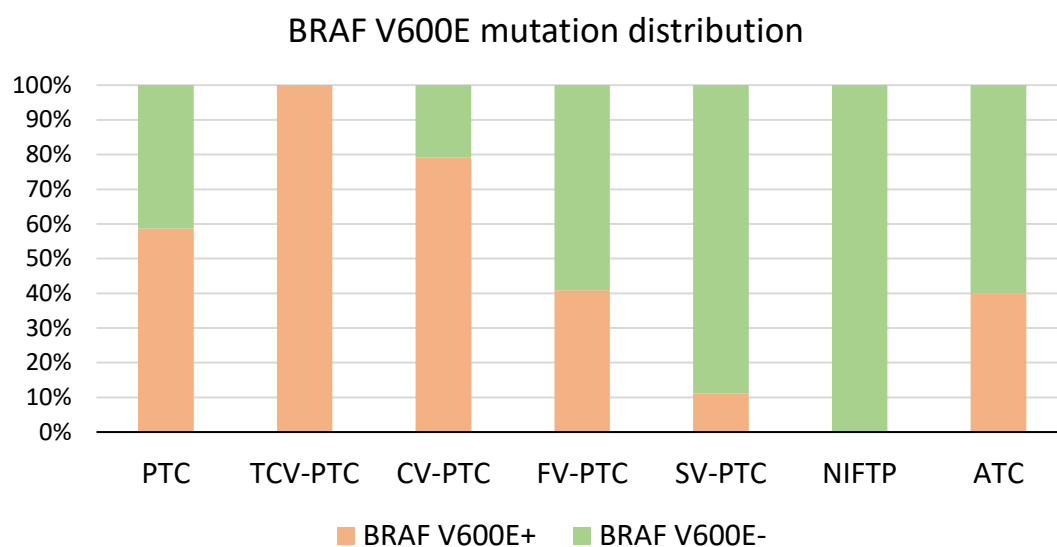

**Figure S2.** Prevalence of the *BRAF*<sup>V600E</sup> mutation in ATC, NIFTP, and different subtypes of PTC. PTC, all variants of papillary thyroid carcinoma; TCV-PTC, tall-cell variant of PTC; CV-PTC, classic variant of PTC; FV-PTC, follicular variant of PTC; SV-PTC, solid variant of PTC; NIFTP, noninvasive follicular thyroid neoplasm with papillarylike nuclear features; ATC, anaplastic thyroid carcinoma.

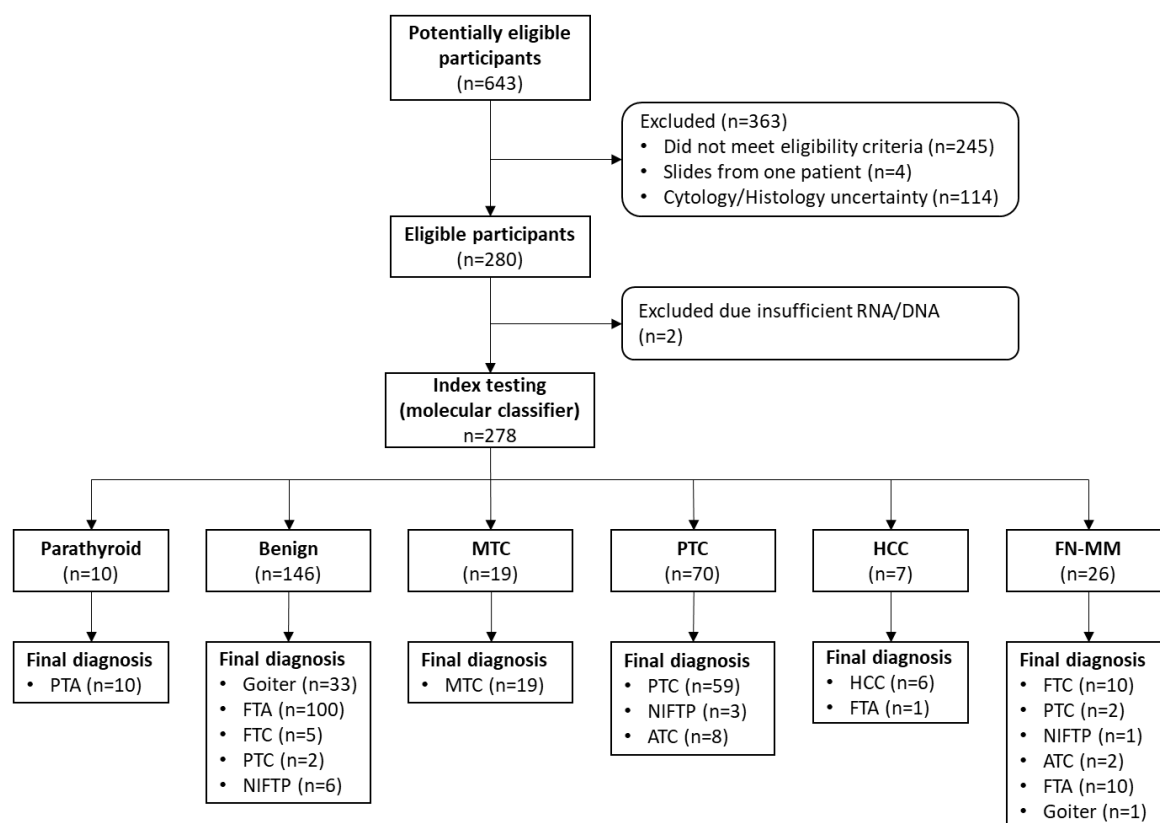

**Figure S3.** A Standards for Reporting of Diagnostic Accuracy Studies diagram of sample flow through this study.

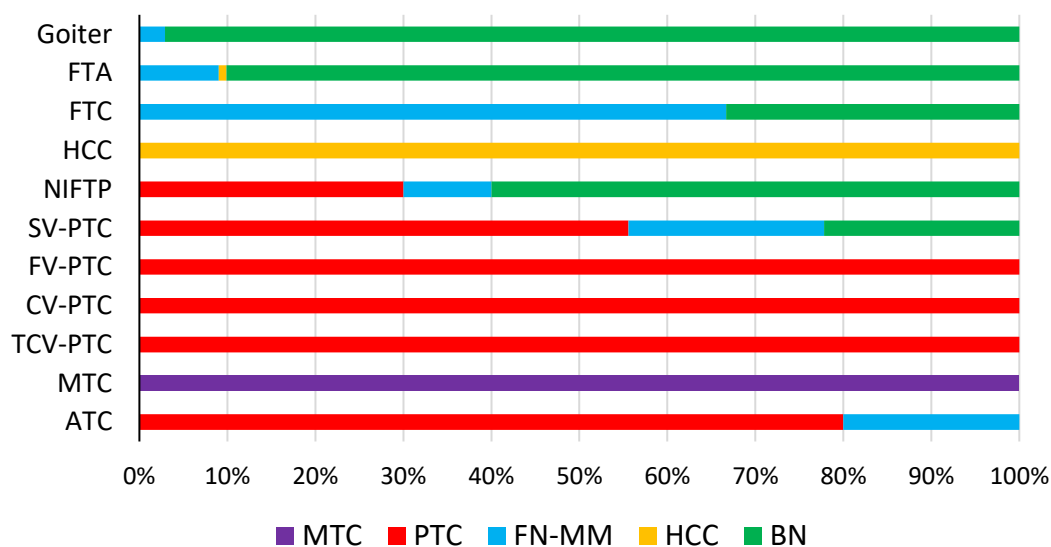

**Figure S4.** Proportions of samples belonging to different classes according to the molecular classifier but belonging to the same class according to a pathology report (i.e., histological examination; indicated on the left). ATC, anaplastic thyroid carcinoma; BN, benign nodule; CV-PTC, classic variant of PTC; FN-MM, follicular neoplasm with markers of malignancy; FTA, follicular thyroid adenoma; FTC, follicular thyroid carcinoma; FV-PTC, follicular variant of PTC; HCC, Hürthle cell carcinoma; MTC, medullary thyroid carcinoma; NIFTP, noninvasive follicular thyroid neoplasm with papillarylike nuclear features; SV-PTC, solid variant of PTC; TCV-PTC, tall-cell variant of PTC.

**Table S2.** The patients' characteristics.

|                    | <b>No. of<br/>samples</b> | <b>Sex, No. (%) of<br/>female patients</b> | <b>Age of patients,<br/>mean (range)</b> | <b>Size on<br/>ultrasonography,<br/>mean (range), cm</b> |
|--------------------|---------------------------|--------------------------------------------|------------------------------------------|----------------------------------------------------------|
| FTA                | 111                       | 84 (75.7)                                  | 50 (18-73)                               | 2.8 (0.5-13.0)                                           |
| FTC                | 21                        | 15 (71.4)                                  | 46 (28-72)                               | 2.7 (1.1-5.0)                                            |
| FV-PTC             | 22                        | 19 (86.3)                                  | 53 (18-71)                               | 1.9 (1.0-5.7)                                            |
| TCV-PTC            | 8                         | 5 (62.5)                                   | 53 (41-69)                               | 1.7 (0.5-3.0)                                            |
| SV-PTC             | 9                         | 7 (77.7)                                   | 37 (18-57)                               | 1.6 (0.5-2.5)                                            |
| CV-PTC             | 24                        | 19 (79.2)                                  | 44 (20-68)                               | 1.9 (0.5-3.7)                                            |
| NIFTP              | 10                        | 7 (70)                                     | 50 (29-70)                               | 2.7 (1.4-7.0)                                            |
| MTC                | 19                        | 16 (84.2)                                  | 54 (23-80)                               | 1.5 (0.5-5.5)                                            |
| ATC                | 10                        | 8 (80)                                     | 70 (50-85)                               | 7.1 (1.0-12.0)                                           |
| PTA                | 10                        | 10 (100)                                   | 51 (36-66)                               | 1.4 (1.0-2.0)                                            |
| Goiter             | 34                        | 28 (82.3)                                  | 52 (23-72)                               | 3.4 (0.5-10.0)                                           |
| <b>All samples</b> | <b>278</b>                | <b>218 (78.4)</b>                          | <b>51 (18-85)</b>                        | <b>2.5 (0.5-13.0)</b>                                    |

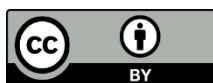

© 2020 by the authors. Licensee MDPI, Basel, Switzerland. This article is an open access article distributed under the terms and conditions of the Creative Commons Attribution (CC BY) license (<http://creativecommons.org/licenses/by/4.0/>).
